# Supplementary material for: Influence of Phosphorus Structures and Their Oxidation States on Flame-Retardant Properties of Polyhydroxyurethanes
Source: MDPI journal article supplement (doi:10.3390/molecules28020611), 2023-01-06
Supplement: s1 [file s1]

# Influence of Phosphorus Structures and Their Oxidation States on Flame-Retardant Properties of Polyhydroxyurethanes.

Maxinne Denis <sup>1</sup>, Guilhem Coste <sup>1</sup>, Rodolphe Sonnier <sup>2,\*</sup>, Sylvain Caillol <sup>1</sup> and Claire Negrell <sup>1,\*</sup>

<sup>1</sup> ICGM, Université de Montpellier, CNRS, ENSCM, Montpellier, 34000, France; maxinne.denis@enscm.fr (M.D.); guilhem.coste@enscm.fr (G.C.); sylvain.caillol@enscm.fr (S.C.)

<sup>2</sup> Polymers Composites and Hybrids (PCH), IMT Mines Ales, Ales, 30100, France

\* Correspondence: rodolphe.sonnier@mines-ales.fr (R.S.); claire.negrell@enscm.fr (C.N.)

## 1. NMR spectra

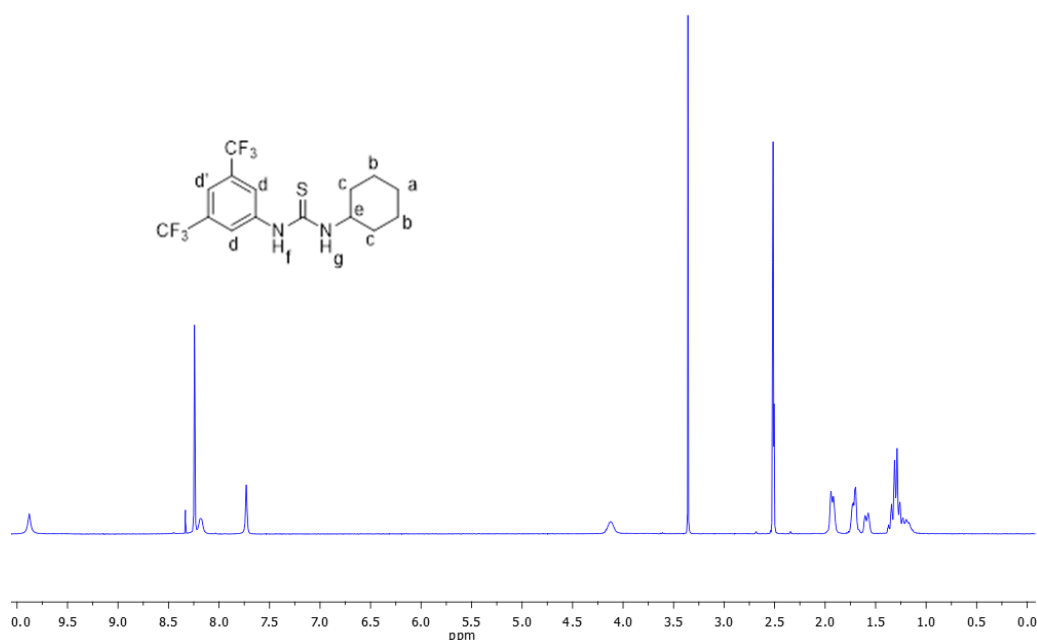

Figure S1: Thiourea <sup>1</sup>H NMR

<sup>1</sup>H NMR (400 MHz, DMSO-d<sub>6</sub>, ppm):  $\delta$  = 1.44 (m, 4H, H<sub>b</sub>), 1.5-1.99 (m, 4H, H<sub>c</sub>), 2.66 (m, 3H, H<sub>e</sub> and H<sub>a</sub>), 7.75 (s, 4H, H<sub>d</sub>.), 8.18 (s, 1H, NH<sub>g</sub>), 8.39 (s, 2H, H<sub>d'</sub>), 9.89 (s, 1H, NH<sub>f</sub>).

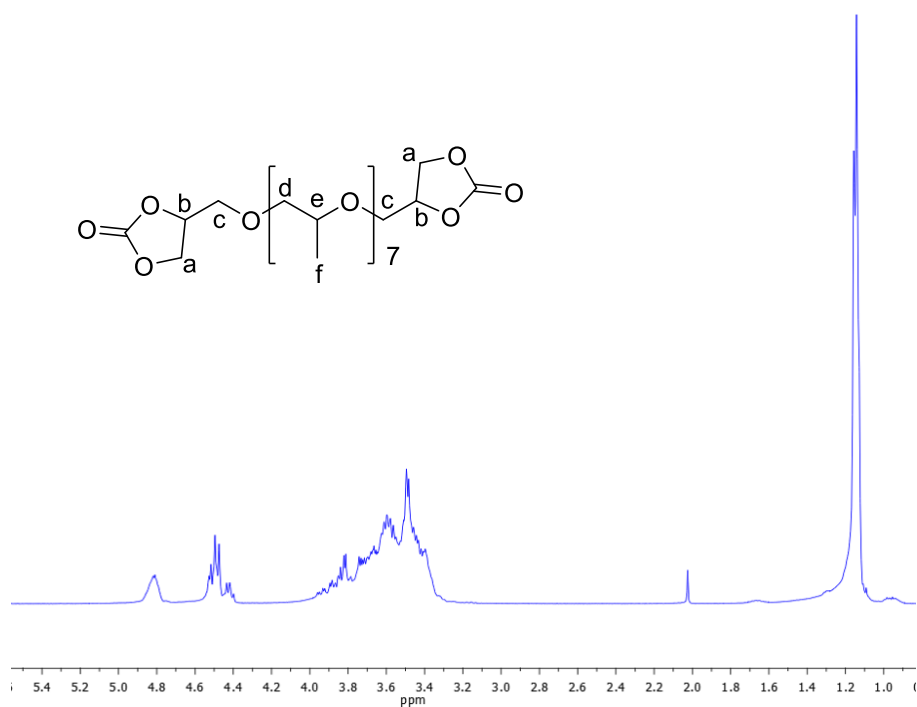

Figure S2: PPO DC  $^1\text{H}$  NMR

$^1\text{H}$  NMR (400 MHz,  $\text{CDCl}_3$ , ppm):  $\delta$  = 1.15 (d, 21H,  $\text{CH}_3$ ,  $\text{H}_f$ ), 3.33-3.95 (m, 25H,  $\text{H}_c$ ,  $\text{H}_d$  and  $\text{H}_e$ ), 4.5 (m, 4H,  $\text{CH}_2$ ,  $\text{H}_a$ ), 4.8 (t, 2H, CH,  $\text{H}_b$ ).

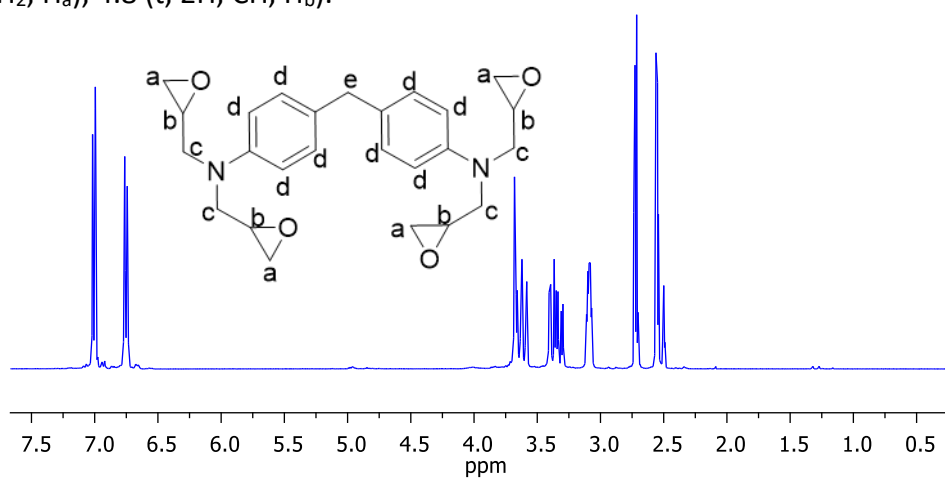

Figure S3: MBDA  $^1\text{H}$  NMR

$^1\text{H}$  NMR (400 MHz,  $\text{DMSO-d}_6$ , ppm):  $\delta$  = 2.56 (m, 4H,  $\text{H}_a$ ), 2.71 (m, 4H,  $\text{H}_a$ ), 3.08 (m, 4H,  $\text{H}_b$ ), 3.37 (m, 4H,  $\text{H}_c$ ), 3.62 (dt, 4H,  $\text{H}_c$ ), 3.68 (s, 2H,  $\text{H}_e$ ), 6.68 (m, 4H,  $\text{H}_d$ ), 6.99 (m, 4H,  $\text{H}_d$ ).

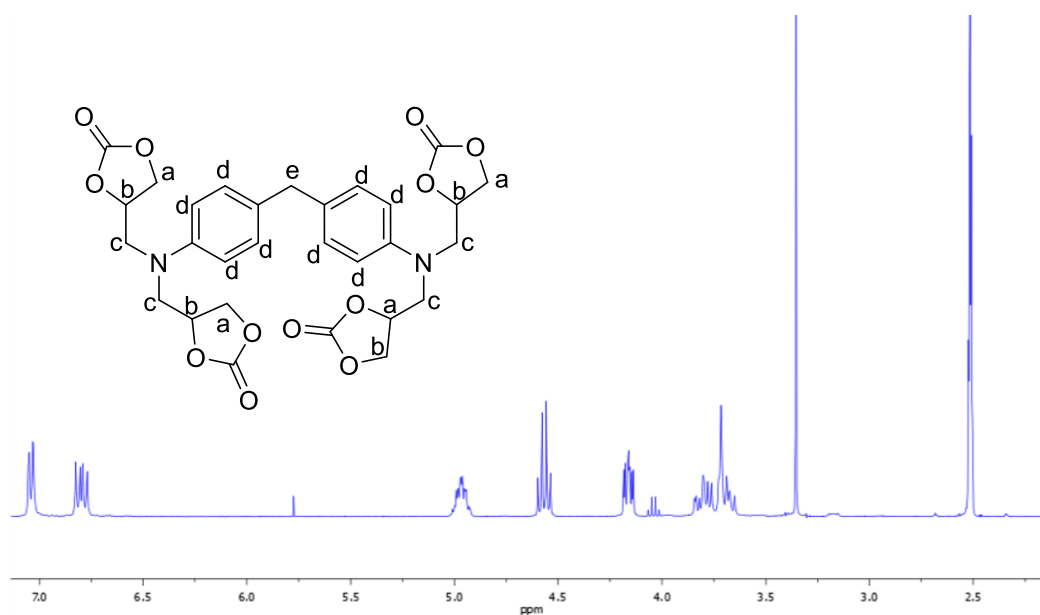

Figure S4: MBDAC  $^1\text{H}$  NMR in DMSO

$^1\text{H}$  NMR (400 MHz, DMSO- $d_6$ , ppm):  $\delta$  = 3.92 (m, 10H,  $\text{H}_c$  and  $\text{H}_e$ ), 4.27 (m, 4H,  $\text{H}_a$ ), 4.51 (m, 4H,  $\text{H}_a$ ), 4.89 (m, 4H,  $\text{H}_b$ ), 6.72 (m, 4H,  $\text{H}_d$ ), 7.10 (m, 4H,  $\text{H}_d$ ).

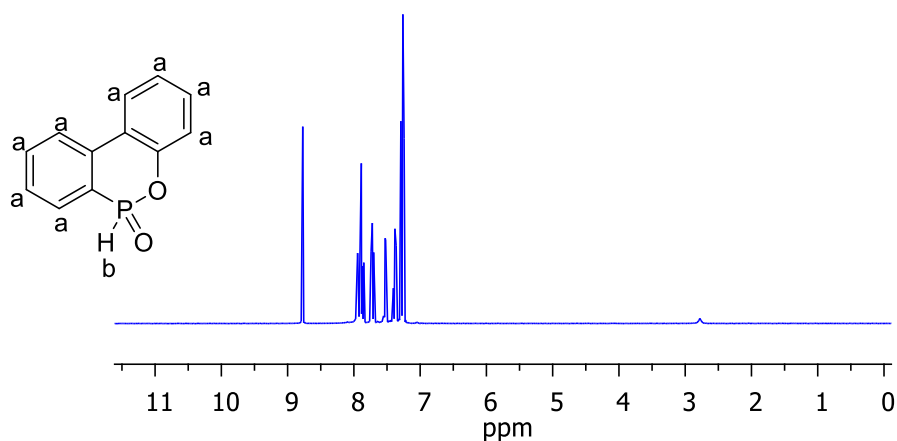

Figure S5: DOPO  $^1\text{H}$  NMR

$^1\text{H}$  NMR (400 MHz,  $\text{CDCl}_3$ , ppm):  $\delta$  = 7.19-7.93 (m, 8H,  $\text{H}_a$ ), 8.78 (s, 1H,  $\text{H}_b$ ).

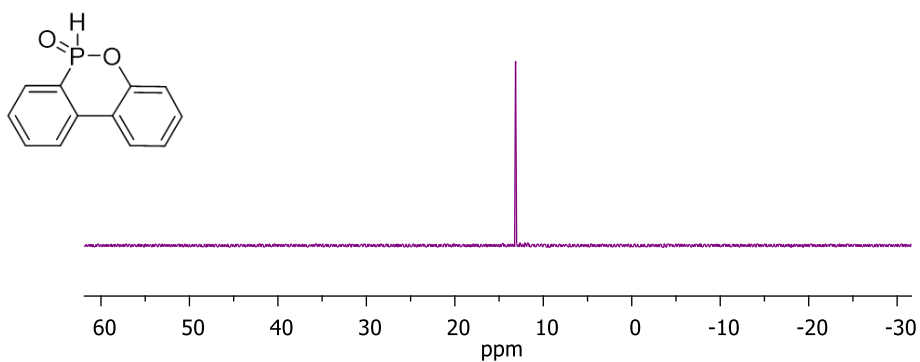

Figure S6: DOPO  $^{31}\text{P}$  NMR

$^{31}\text{P}$  NMR (400 MHz,  $\text{CDCl}_3$ , ppm):  $\delta$  = 14.82 (P-H)

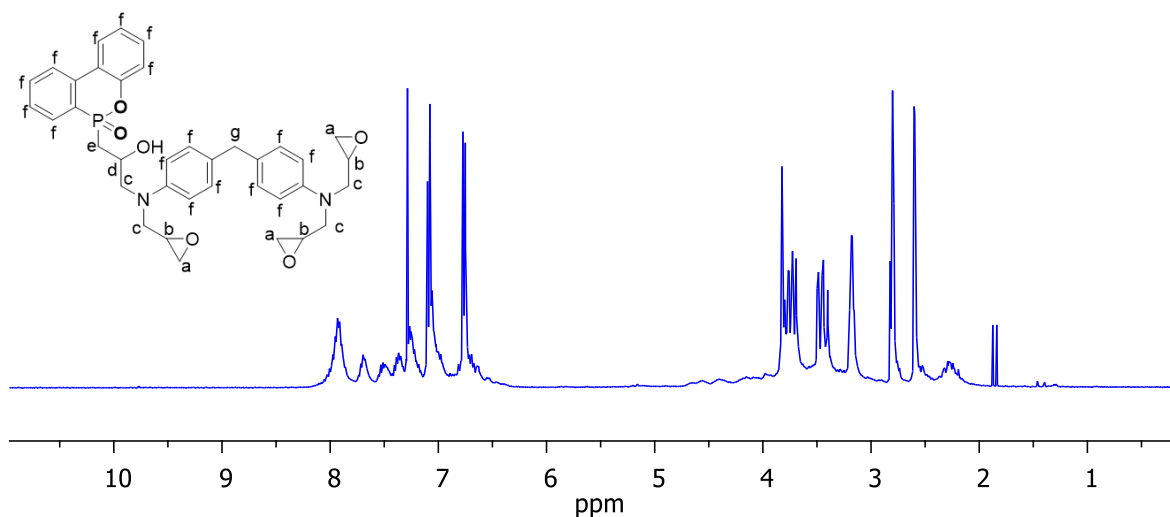

Figure S7: MBDA-DOPO  $^1\text{H}$  NMR

$^1\text{H}$  NMR (400 MHz,  $\text{CDCl}_3$ , ppm):  $\delta$  = 2.27 (m, 2H,  $\text{H}_e$ ), 2.61 (m, 3H,  $\text{H}_a$ ), 2.79 (m, 3H,  $\text{H}_b$ ), 3.17 (m, 3H,  $\text{H}_a$ ), 3.45 (m, 4H,  $\text{H}_c$ ), 3.70-3.80 (dt, 5H,  $\text{H}_c$ ,  $\text{H}_d$ ), 3.82 (s, 2H,  $\text{H}_g$ ), 6.68-8.20 (m, 6H,  $\text{H}_f$ ).

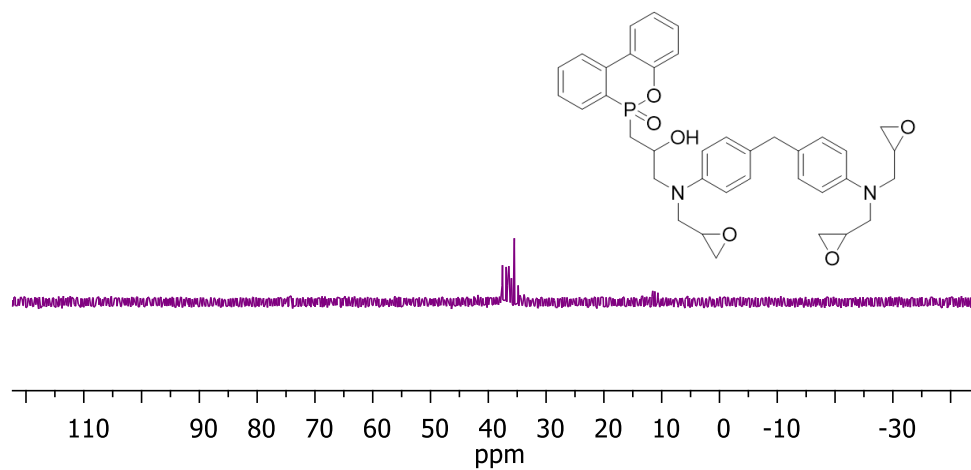

Figure S8: MBDA-DOPO  $^{31}\text{P}$  NMR

$^{31}\text{P}$  NMR (400 MHz,  $\text{CDCl}_3$ , ppm):  $\delta$  = 36.04 (P-C)

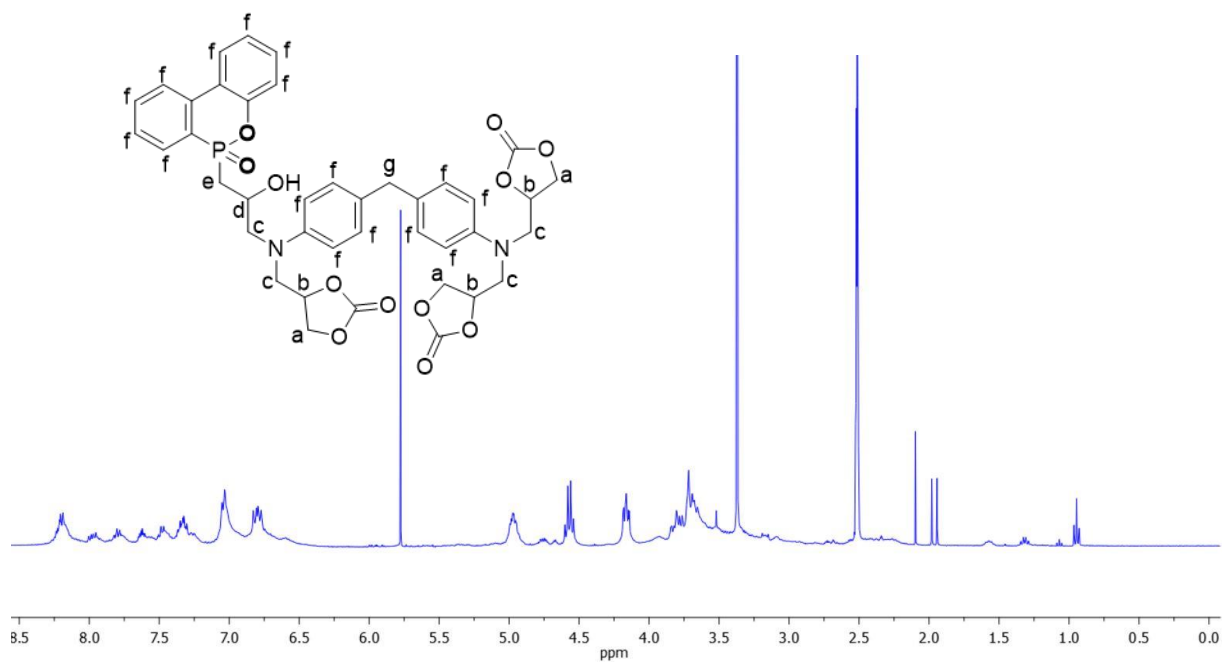

Figure S9: MBDAC-DOPO  $^1\text{H}$  NMR

$^1\text{H}$  NMR (400 MHz, DMSO- $d_6$ , ppm):  $\delta$  = 3.50-3.95 (m, 10H,  $\text{H}_e$ ,  $\text{H}_c$ ), 4.17 (m, 3H,  $\text{H}_a$ ), 4.55 (m, 3H,  $\text{CH}_b$ ), 4.79 (m, 3H,  $\text{H}_a$ ), 6.55-8.30 (m, 15H,  $\text{H}_f$ ).

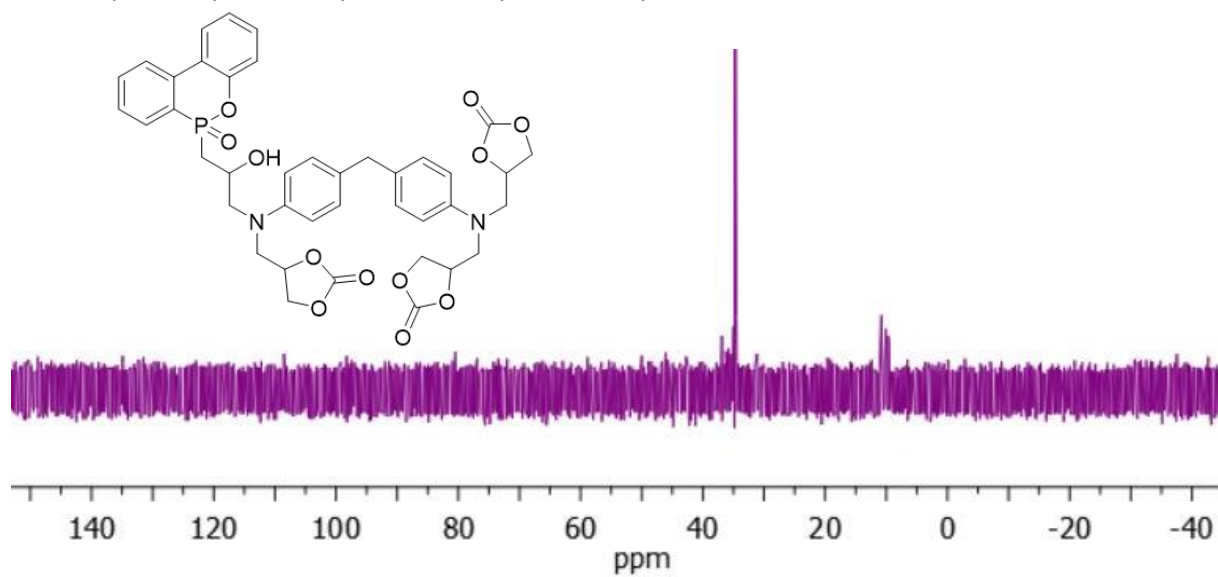

Figure S10: MBDA-DOPO  $^{31}\text{P}$  NMR

$^{31}\text{P}$  NMR (400 MHz,  $\text{CDCl}_3$ , ppm):  $\delta$  = 35.95 (P-C)

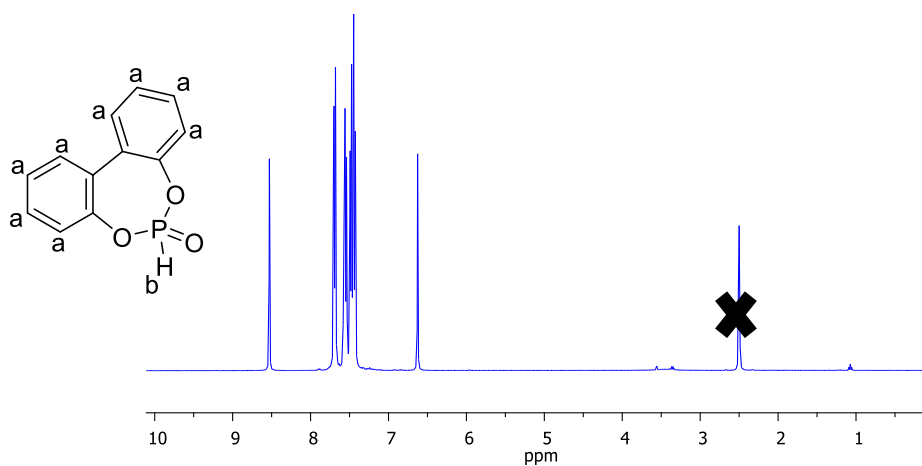

Figure S11: BPPO  $^1\text{H}$  NMR

$^1\text{H}$  NMR (400 MHz, DMSO- $d_6$ , ppm):  $\delta$  = 8.53 and 6.62 (s, H, H<sub>b</sub>), 7.79-7.39 (m, 8H, H<sub>a</sub>).

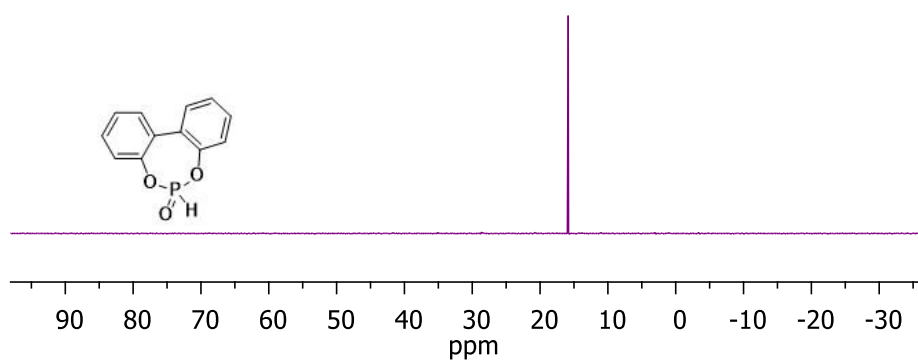

Figure S12: BPPO  $^{31}\text{P}$  NMR

$^{31}\text{P}$  NMR (400 MHz, DMSO- $d_6$ , ppm): 15.9 ppm.

#### MBDA-BPPO

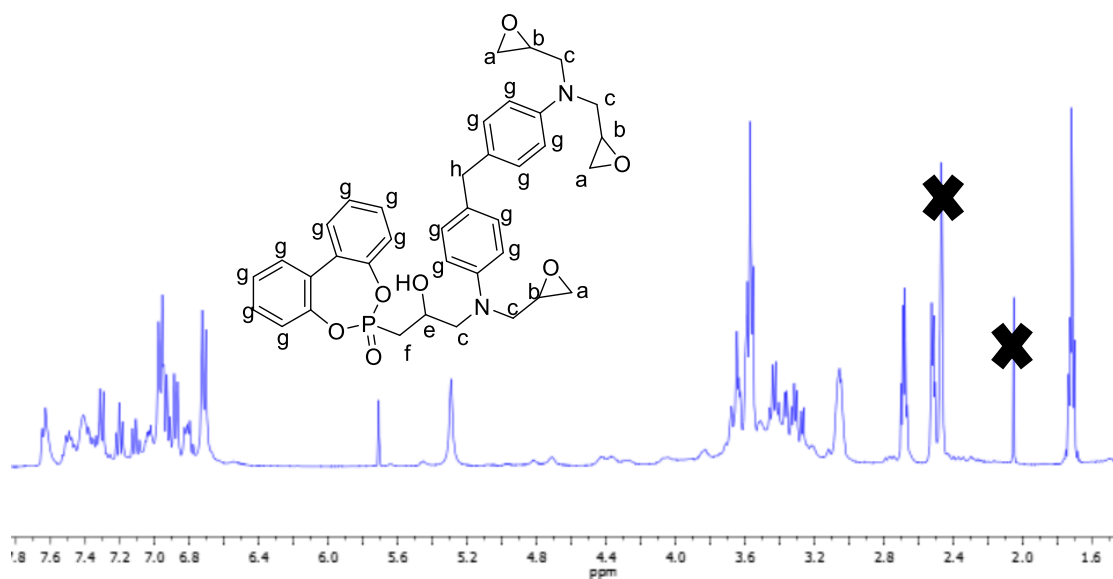

Figure S13: MBDA-BPPO  $^1\text{H}$  NMR

$^1\text{H}$  NMR (400 MHz, DMSO- $d_6$ , ppm):  $\delta$  = 1.15 (m, 2H,  $H_f$ ), 2.42 (m, 3H,  $H_a$ ), 2.52 (m, 3H,  $H_b$ ), 2.68 (m, 3H,  $H_a$ ), 3.2-3.6 (m, 8H,  $H_e$ ,  $H_c$ ,  $H_h$ ), 6.6-7.7 (m, 15H,  $H_g$ ).

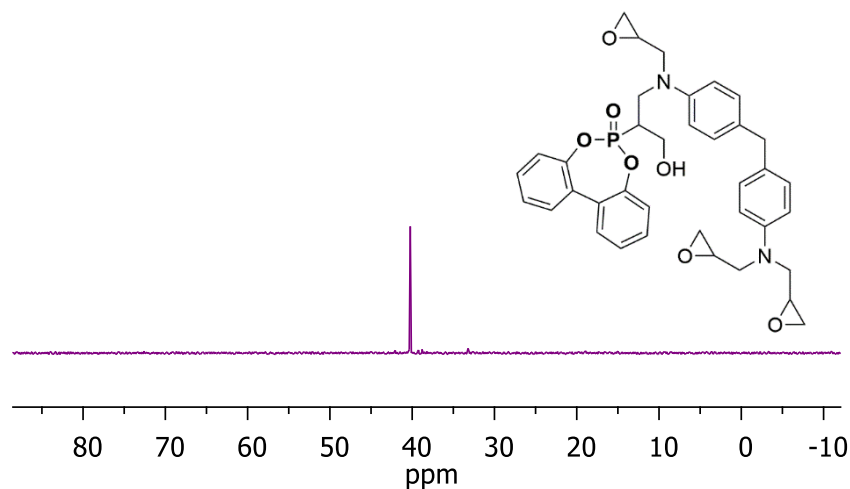

Figure S14: MBDA-BPPO  $^{31}\text{P}$  NMR

$^{31}\text{P}$  NMR (400 MHz, DMSO- $d_6$ , ppm): 39.1 ppm.

#### MBDAC-BPPO

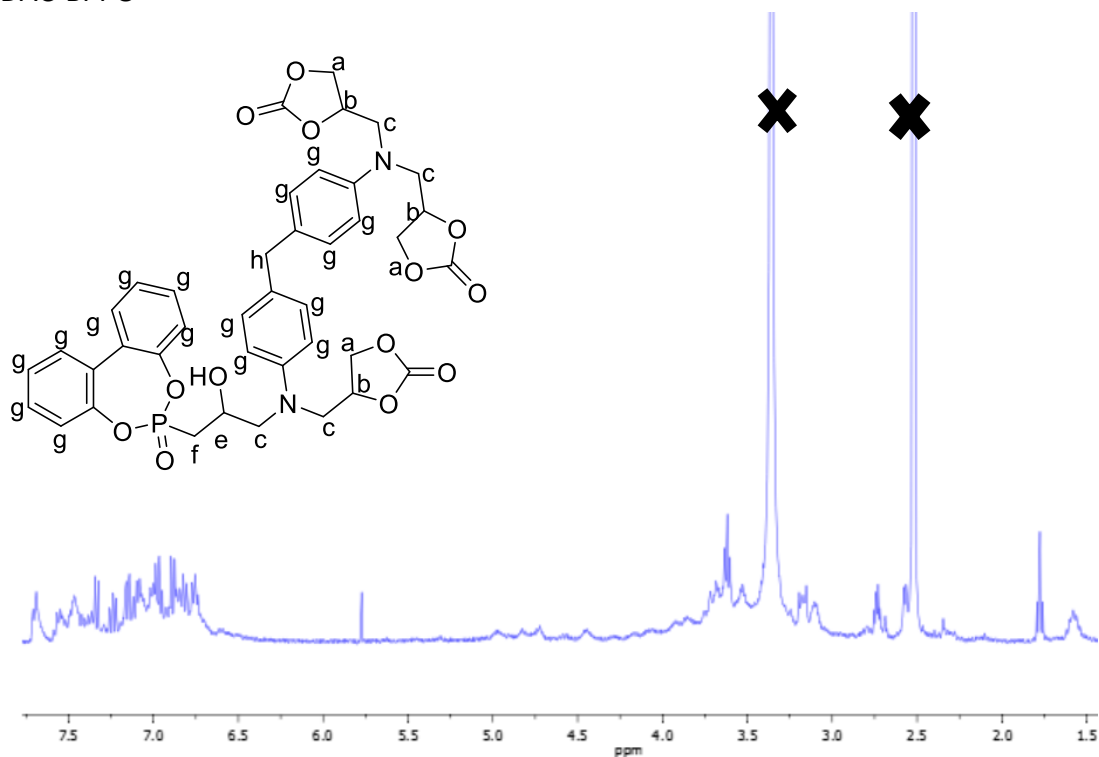

Figure S15: MBDAC-BPPO  $^1\text{H}$  NMR

$^1\text{H}$  NMR (400 MHz, DMSO- $d_6$ , ppm):  $\delta$  = 1.85 (m, 2H,  $H_f$ ), 3.17-4.2 (m, 20H  $H_a$ ,  $H_b$ ,  $H_c$ ,  $H_e$ ,  $H_h$ ), 6.55-7.75 (m, 16H,  $H_g$ ).

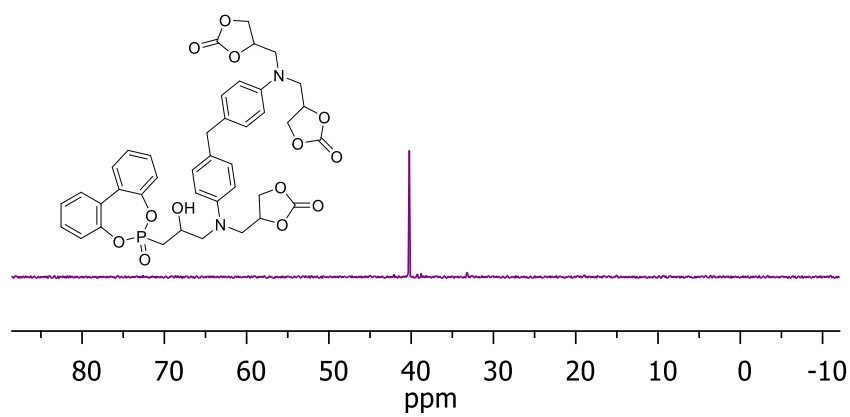

Figure S16: MBDAC-BPPO  $^{31}\text{P}$  NMR

$^{31}\text{P}$  NMR (400 MHz, DMSO- $\text{d}_6$ , ppm): 40.02 ppm.

DEP

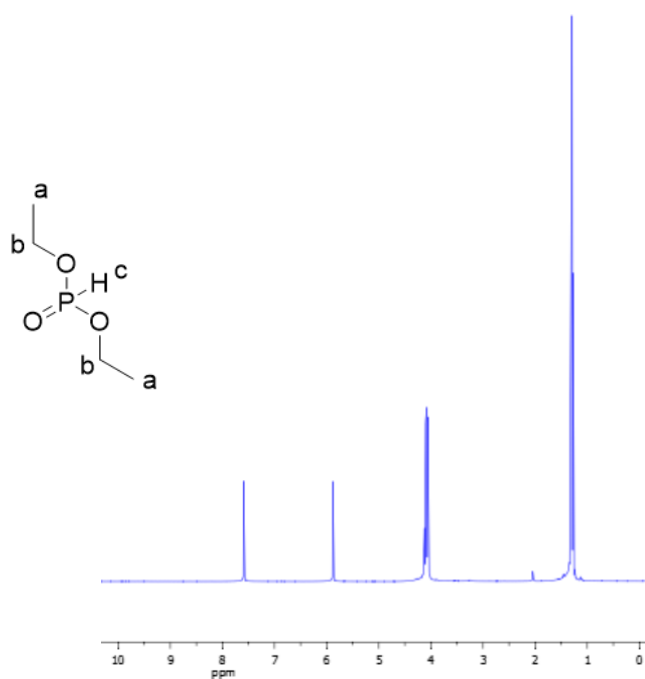

Figure S17: DEP  $^1\text{H}$  NMR

$^1\text{H}$  NMR (400 MHz, Acetone, ppm):  $\delta$  = 1.31 (t, 6H,  $\text{H}_\text{a}$ ), 4.03 (q, 4H  $\text{H}_\text{b}$ ), 5.86 and 7.60 (a, 1H,  $\text{H}_\text{c}$ ).



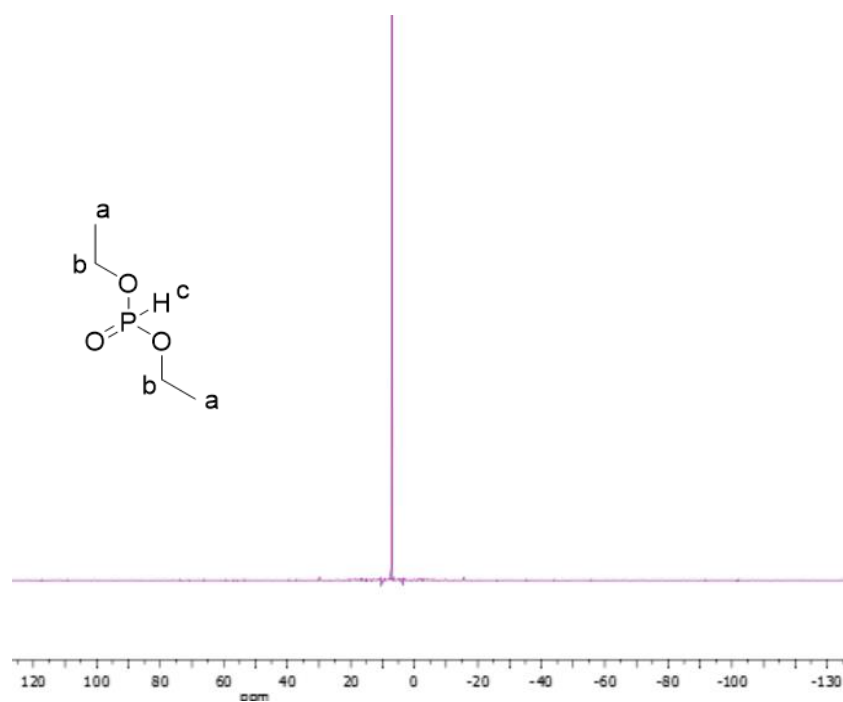

$^{31}\text{P}$  NMR (400 MHz, DMSO- $\text{d}_6$ , ppm): 6.63 ppm.

MBDA-DEP

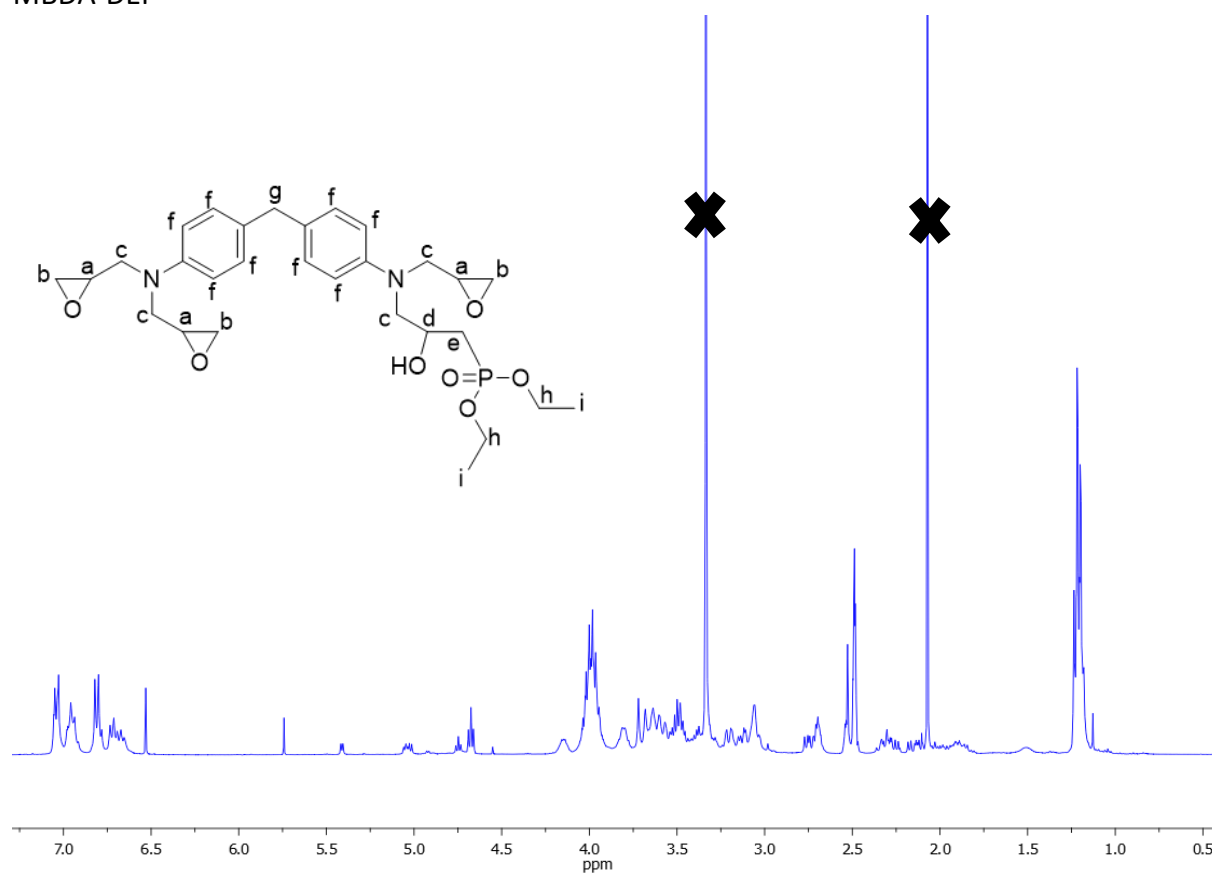

$^1\text{H}$  NMR (400 MHz, DMSO- $d_6$ , ppm):  $\delta$  = 1.36 (m, 6H,  $H_i$ ), 1.8-2.1 (m, 2H,  $H_e$ ), 2.45 (m, 3H,  $H_b$ ), 2.53 (m, 3H,  $H_a$ ), 2.68 (m, 3H,  $H_b$ ), 3.10-3.72 (m, 7H,  $H_c$ ,  $H_d$ ), 3.82-4.19 (m, 6H,  $H_g$ ,  $H_h$ ), 6.76-7.15 (m, 8H,  $H_{ar}$ ).

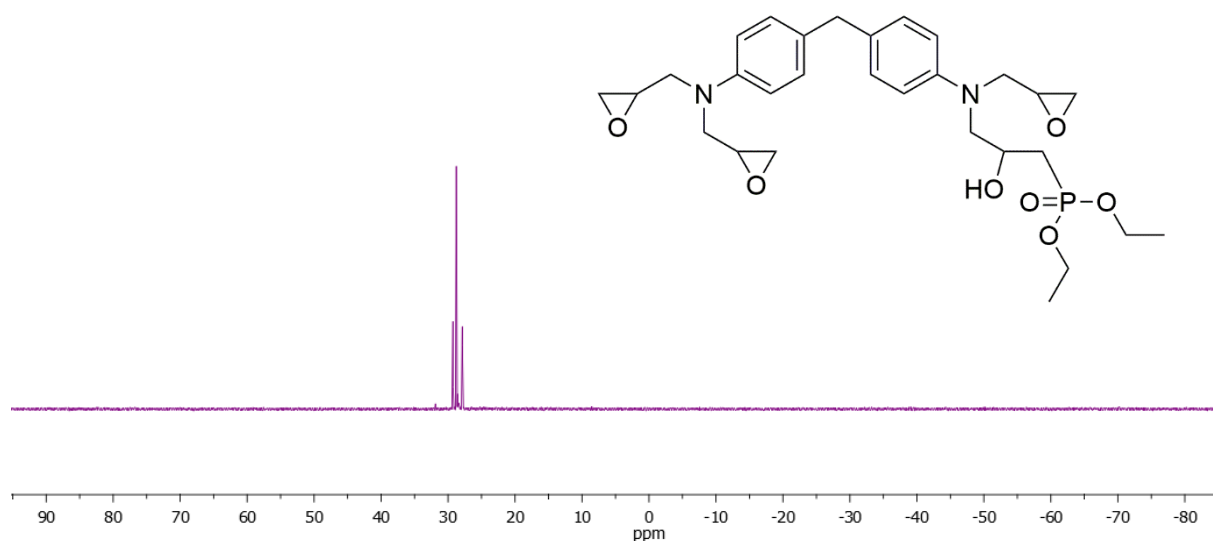

Figure S20: MBDA-DEP  $^{31}\text{P}$  NMR

$^{31}\text{P}$  NMR (400 MHz, DMSO- $d_6$ , ppm): 29.6 ppm.

MBDAC-DEP

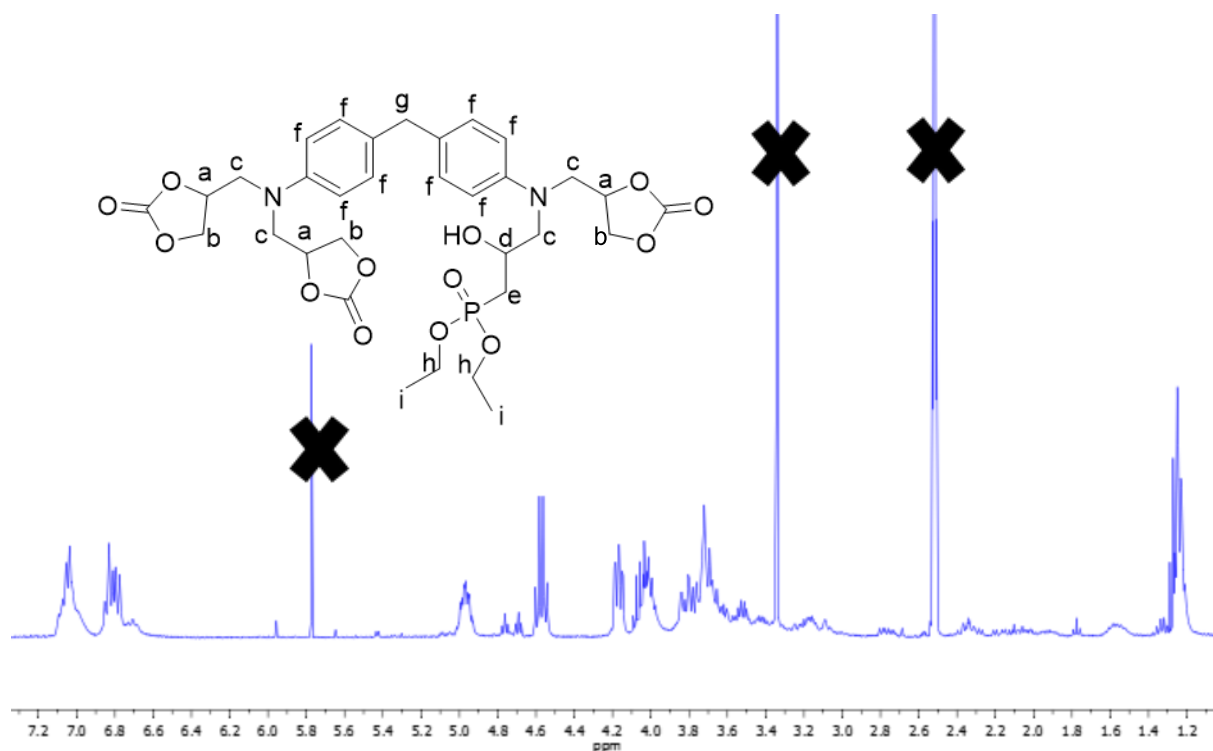

Figure S21: MBDAC-DEP  $^1\text{H}$  NMR

$^1\text{H}$  NMR (400 MHz, DMSO- $d_6$ , ppm):  $\delta$  = 1.25 (m, 6H,  $H_i$ ), 2.34 (m (small), 2H,  $H_e$ ), 3.4-3.82 (m, 5,  $H_c$ ,  $H_d$ ), 3.9-4.1 (m, 4H,  $H_a$ ,  $H_g$ ), 4.18 (m, 3H,  $H_b$ ), 4.58 (q, 4H,  $H_h$ ), 4.9 (m, 3H,  $H_a$ ), 6.7-7.1 (m, 8H,  $H_f$ ).

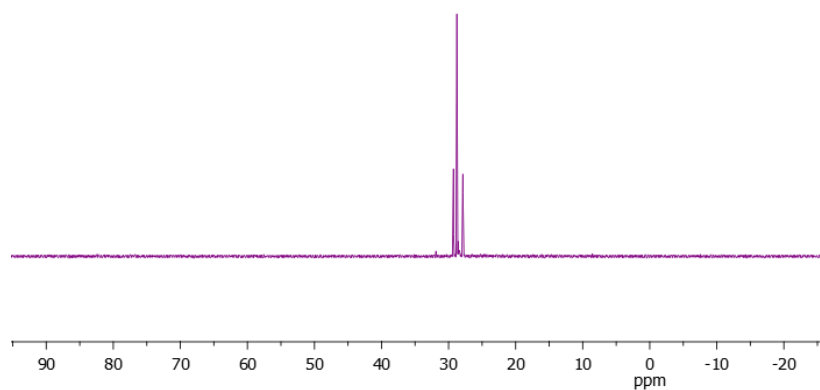

Figure S22: MBDAC-DEP  $^{31}\text{P}$  NMR

$^{31}\text{P}$  NMR (400 MHz, DMSO- $d_6$ , ppm): 29.5 ppm.

DPP

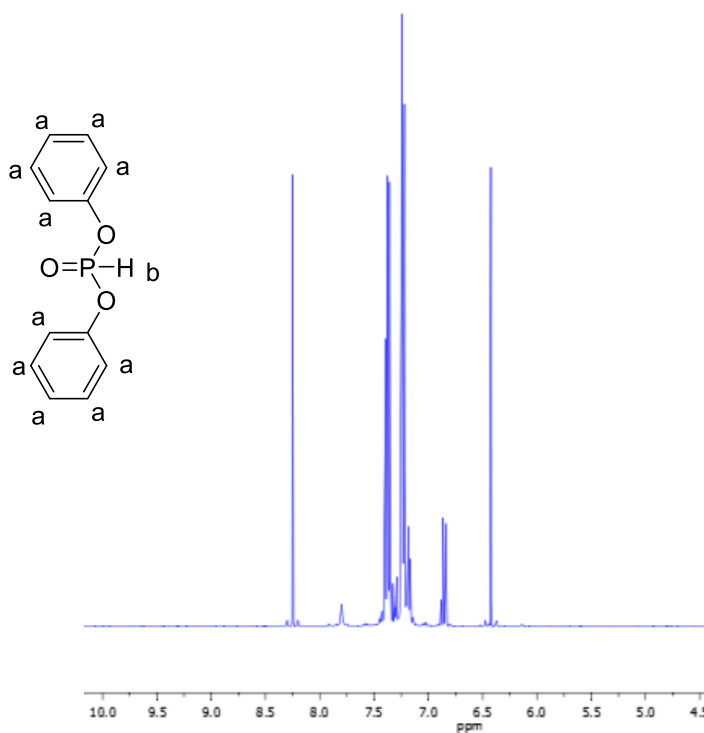

Figure S23: DPP  $^1\text{H}$  NMR

$^1\text{H}$  NMR (400 MHz,  $\text{CDCl}_3$ , ppm):  $\delta$  = 6.42 and 8.24 (s, 1H,  $\text{H}_b$ ), 6.86-7.45 (m, 10H,  $\text{H}_a$ ).

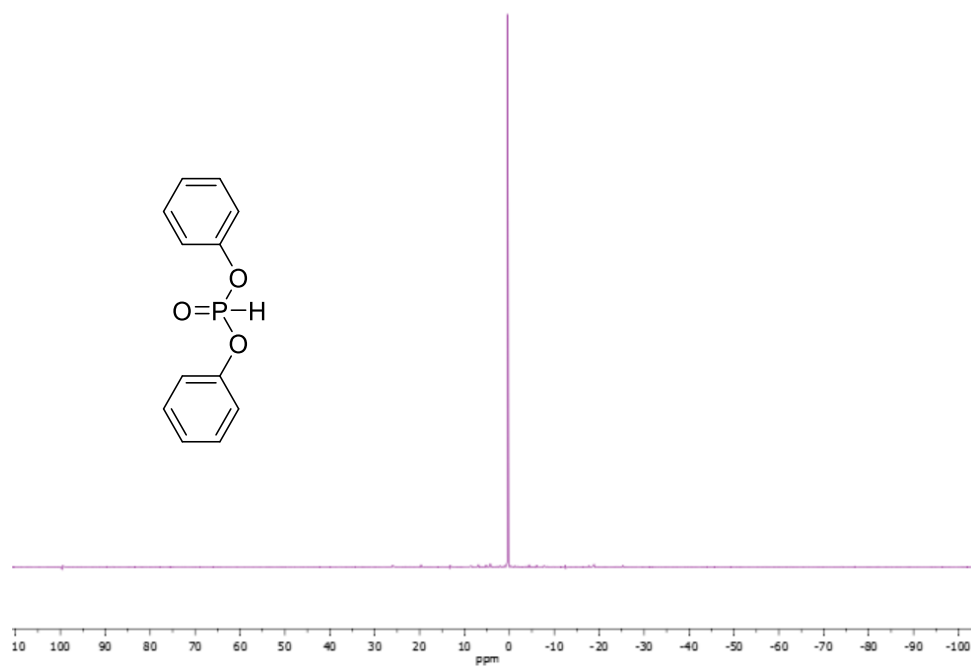

Figure S24: DPP  $^{31}\text{P}$  NMR

$^{31}\text{P}$  NMR (400 MHz,  $\text{CDCl}_3$ , ppm): 0.53 ppm.

#### MBDA-DPP

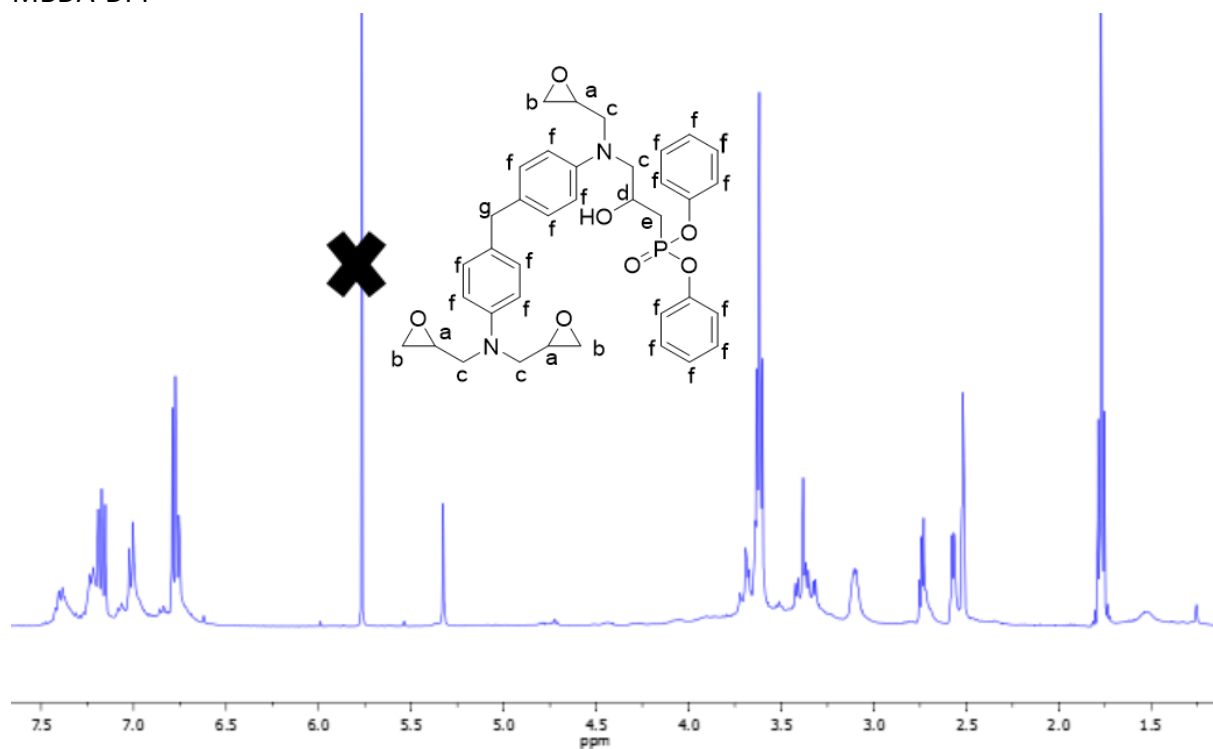

Figure S25: MBDA-DPP  $^1\text{H}$  NMR

$^1\text{H}$  NMR (400 MHz,  $\text{DMSO-d}_6$ , ppm):  $\delta$  = 1.75 (m, 2H,  $\text{H}_e$ ), 2.55 (m, 3H,  $\text{H}_a$ ), 2.72 (m, 3H,  $\text{H}_b$ ), 3.11 (m, 3H,  $\text{H}_a$ ), 3.15 (m, 4H,  $\text{H}_c$ ), 3.30-3.8 (m, 7H,  $\text{H}_c$ ,  $\text{H}_g$ ,  $\text{H}_d$ ), 6.21-7.50 (m, 18H,  $\text{H}_f$ ).

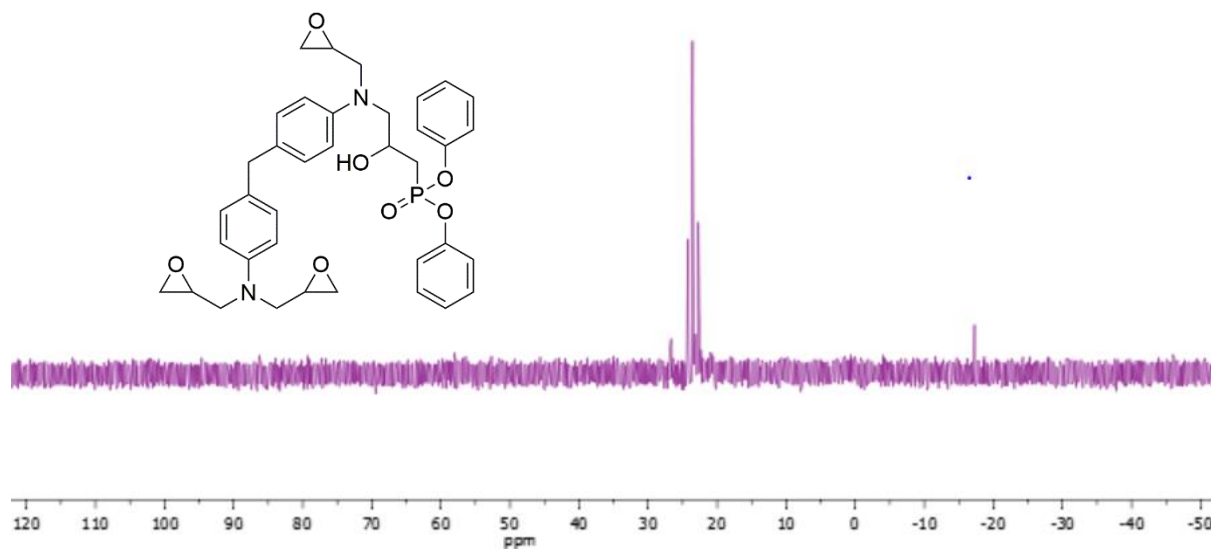

Figure S26: MBDA-DPP  $^{31}\text{P}$  NMR

$^{31}\text{P}$  NMR (400 MHz, DMSO- $\text{d}_6$ , ppm): 23.4 ppm.

MBDAC-DPP

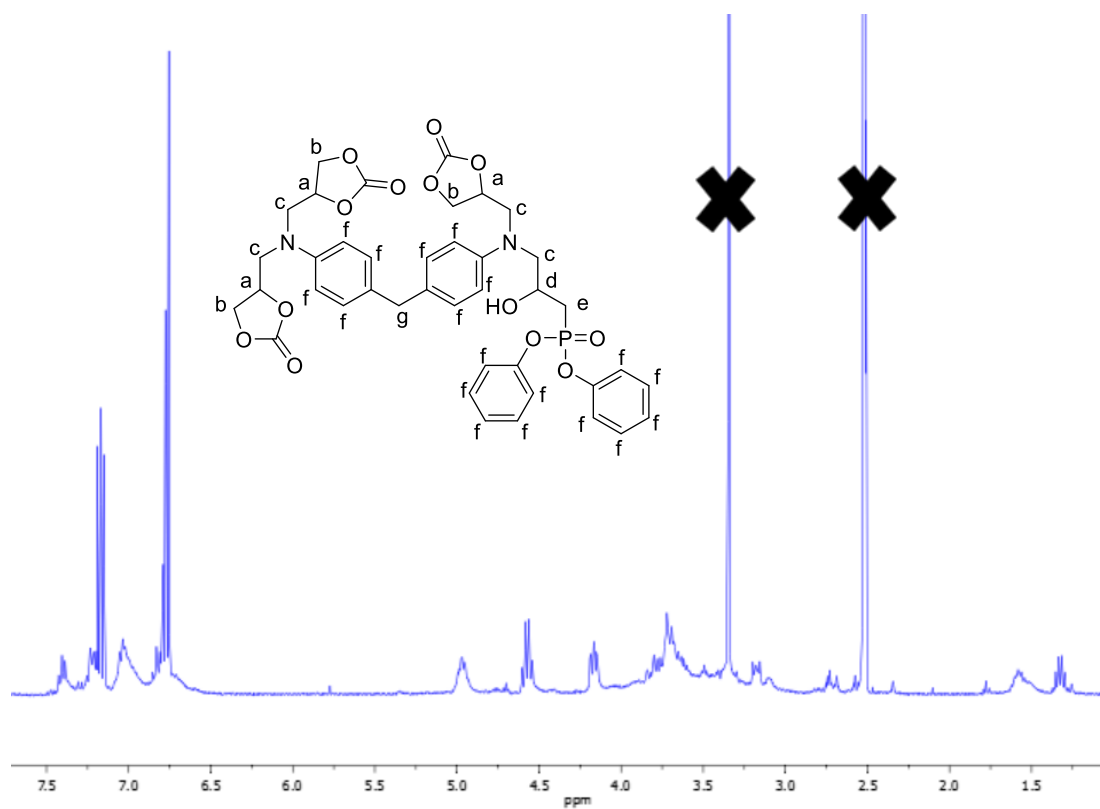

Figure S27: MBDAC-DPP  $^1\text{H}$  NMR

$^1\text{H}$  NMR (400 MHz, DMSO- $\text{d}_6$ , ppm):  $\delta$  = 1.6 (m, 2H,  $\text{H}_e$ ), 3.25-3.80 (m, 9H,  $\text{H}_c$ ,  $\text{H}_d$ ), 4.2 (m, 3H,  $\text{H}_b$ ), 4.6 (m, 3H,  $\text{H}_a$ ), 4.92 (m, 3H,  $\text{H}_b$ ), 6.57-7.47 (m, 18H,  $\text{H}_f$ ).

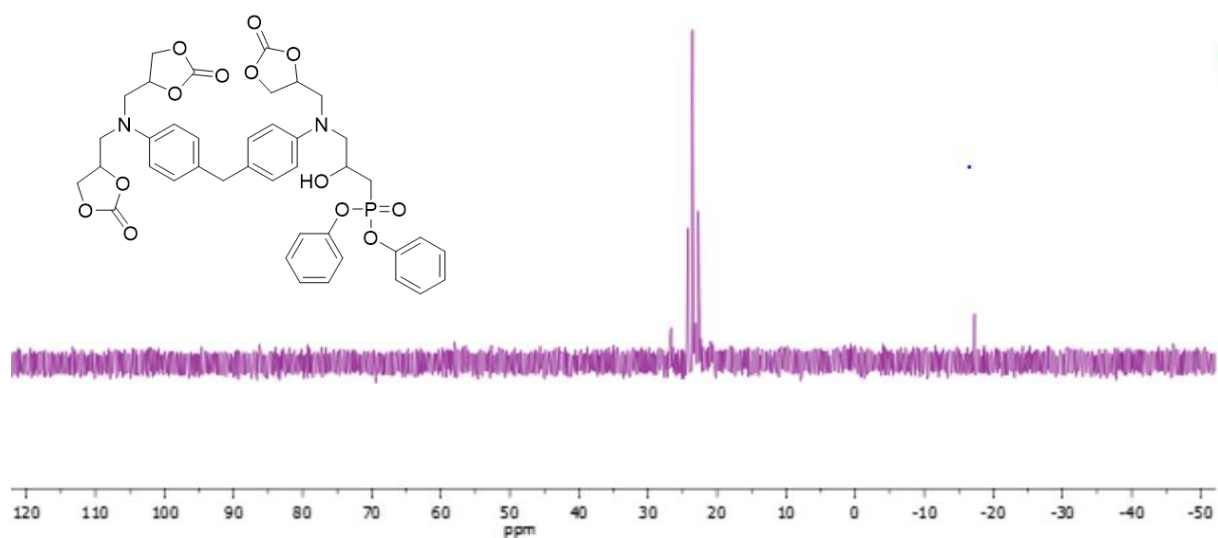

Figure S28: MBDA-DPP  $^{31}\text{P}$  NMR

$^{31}\text{P}$  NMR (400 MHz, DMSO- $\text{d}_6$ , ppm): 23.4 ppm.

## 2. Foams formulations

Table S1: Foams formulations with DOPO

| Foams        | PPOBC (g) | MBDAC (g) | MBDAC-DOPO (g) | EDR-148 (g) | Cat. (g) |
|--------------|-----------|-----------|----------------|-------------|----------|
| MBDAC ref    | 3.3       | 3.4       | 0              | 2.6         | 0.41     |
| MBDAC-DOPO 1 | 3.3       | 2.0       | 2.5            | 2.3         | 0.41     |
| MBDAC-DOPO 2 | 3.3       | 0         | 5.0            | 2.1         | 0.41     |

Table S2: Foams formulations with BPPO

| Foams        | PPOBC (g) | MBDAC (g) | MBDAC-BPPO (g) | EDR-148 (g) | Cat. (g) |
|--------------|-----------|-----------|----------------|-------------|----------|
| MBDAC ref    | 3.3       | 3.4       | 0              | 2.6         | 0.41     |
| MBDAC-BPPO 1 | 3.3       | 2.0       | 2.5            | 2.3         | 0.41     |
| MBDAC-BPPO 2 | 3.3       | 0         | 5.0            | 2.1         | 0.41     |

Table S3: Foams formulations with DEP

| Foams       | PPOBC (g) | MBDAC (g) | MBDAC-DEP (g) | EDR-148 (g) | Cat. (g) |
|-------------|-----------|-----------|---------------|-------------|----------|
| MBDAC ref   | 3.3       | 3.4       | 0             | 2.6         | 0.41     |
| MBDAC-DEP 1 | 3.3       | 2.0       | 2.3           | 2.3         | 0.41     |

|             |     |     |     |     |      |
|-------------|-----|-----|-----|-----|------|
| MBDAC-DEP 2 | 3.3 | 0.3 | 4.8 | 2.1 | 0.41 |
|-------------|-----|-----|-----|-----|------|

Table S4: Foams formulations with DPP

| Foams       | PPOBC (g) | MBDAC (g) | MBDAC-DPP (g) | EDR-148 (g) | Cat. (g) |
|-------------|-----------|-----------|---------------|-------------|----------|
| MBDAC ref   | 3.3       | 3.4       | 0             | 2.6         | 0.41     |
| MBDAC-DPP 1 | 3.3       | 2.0       | 2.5           | 2.3         | 0.41     |
| MBDAC-DPP 2 | 3.3       | 0         | 5.0           | 2.1         | 0.41     |

### 3. Differential Scanning Calorimetry

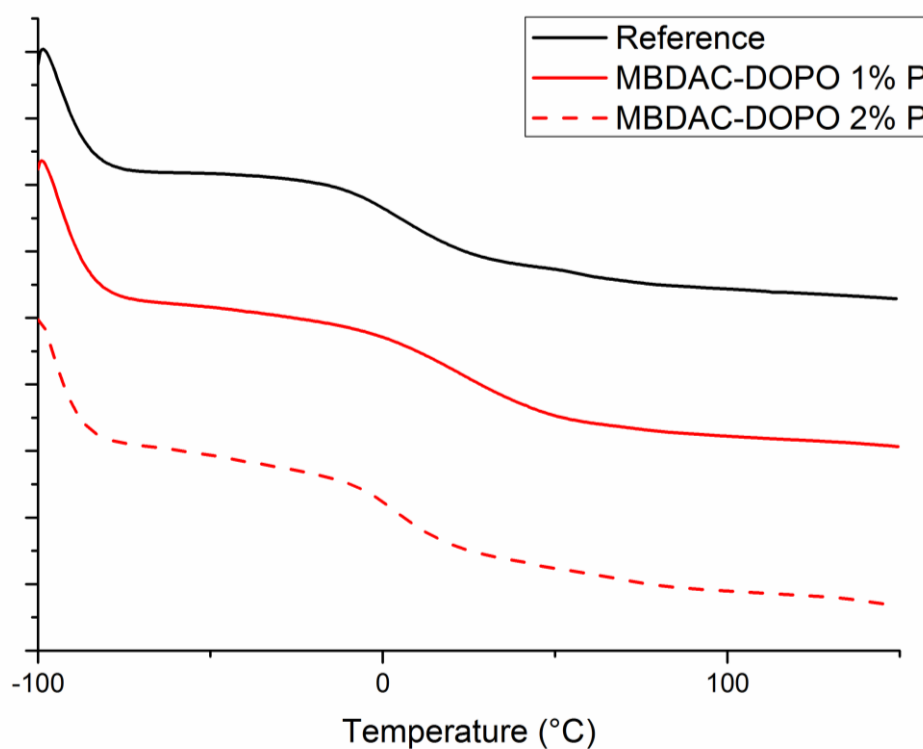

Figure S29: DSC thermograms of the MBDAC-DOPO thermosets

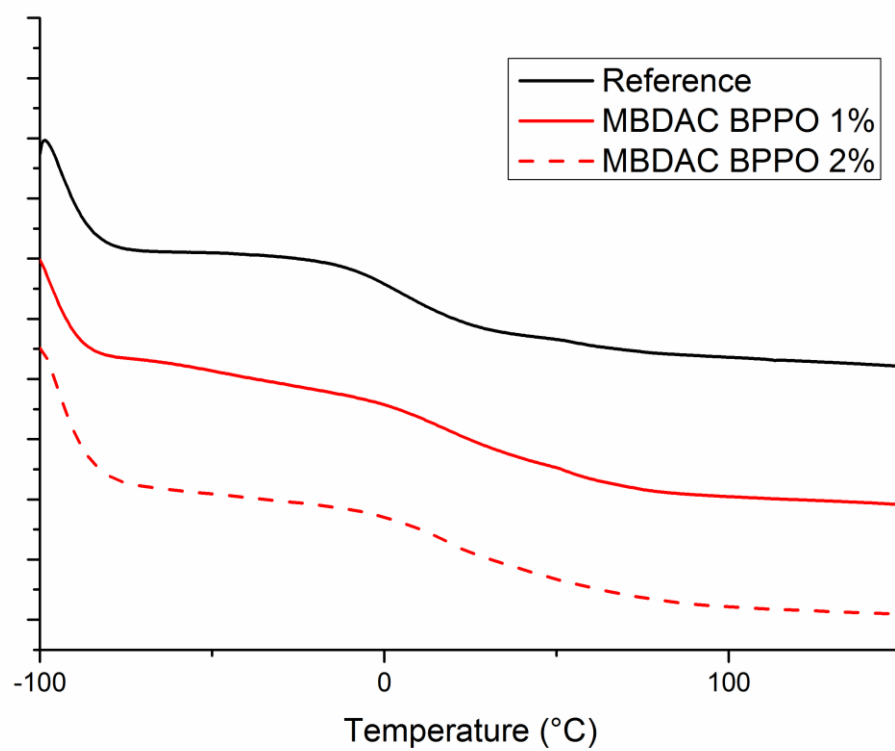

Figure S30: DSC thermograms of the MBDAC-BPPO thermosets

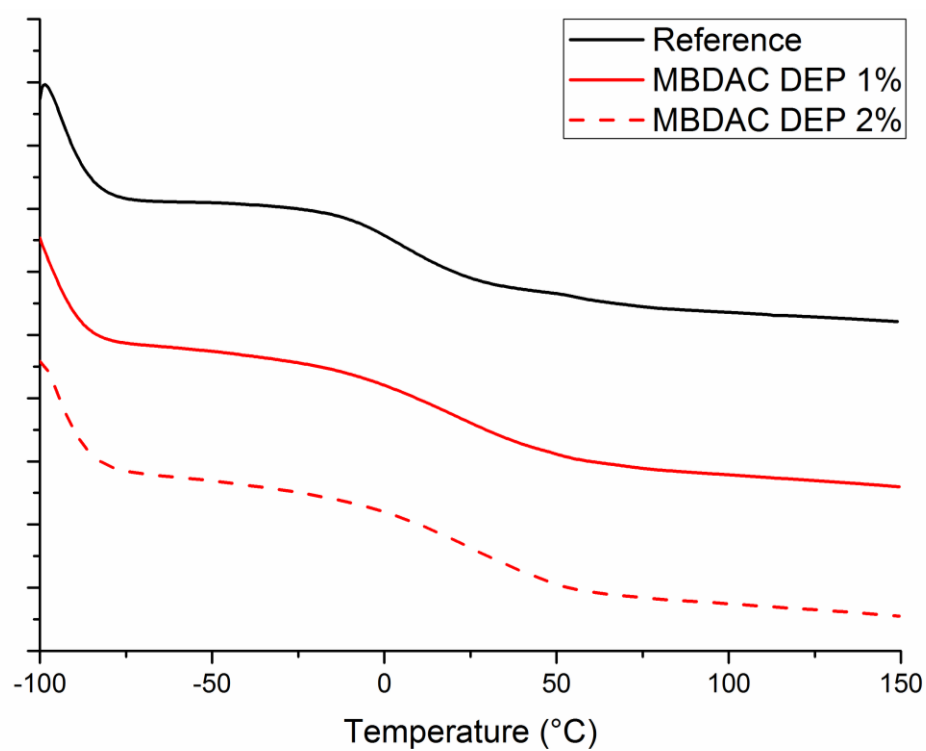

Figure S31: DSC thermograms of the MBDAC-DEP thermosets



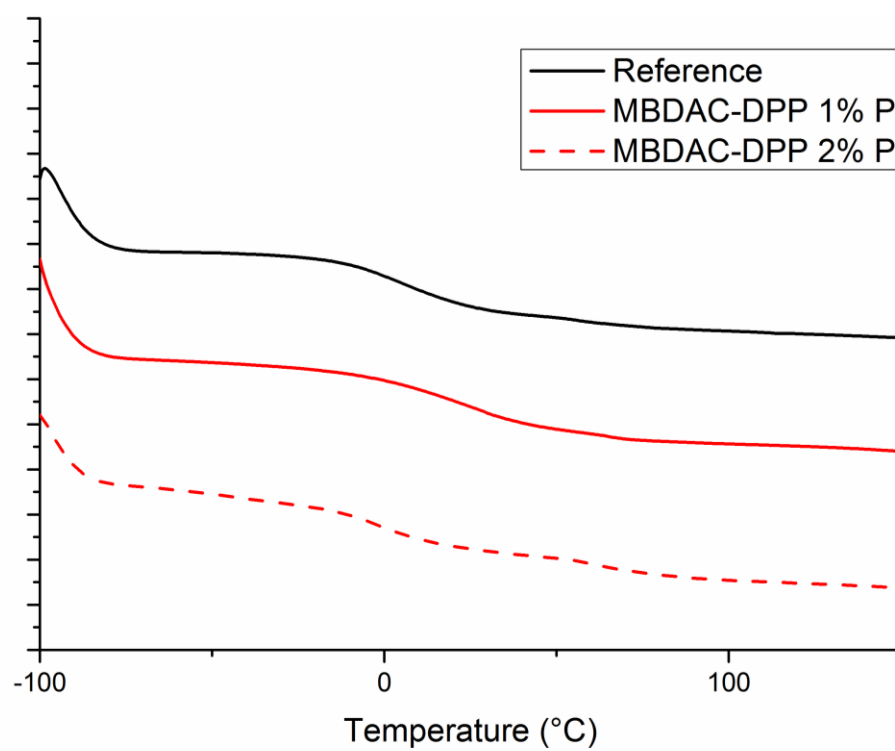

Figure S32: DSC thermograms of the MBDAC-DPP thermosets
